# Supplementary material for: Synthesis of biodegradable PGA-PBC-PGA triblock copolymers and closed-loop recycling via a thermal depolymerization strategy
Source: Royal Society of Chemistry journal article supplement (doi:10.1039/d3gc03236a), 2023-01-01
Supplement: d3gc03236a1.pdf [file d3gc03236a1.pdf]

## **Synthesis of biodegradable PGA-PBC-PGA triblock copolymers and closed-loop recycling via a thermal depolymerization strategy**

Yong Wang,<sup>a, b</sup> Liang Wen,<sup>\*c</sup> Jiajian Liu,<sup>\*a</sup> Chuncheng Li,<sup>\*a</sup> Zijian Zhang,<sup>c</sup> Yaonan Xiao,<sup>a</sup> Tian Yin,<sup>c</sup> Shaohua Wu,<sup>a</sup> Zhikui Jiang,<sup>c</sup> and Bo Zhang<sup>a</sup>

<sup>a</sup> Beijing National Laboratory for Molecular Sciences, Key Laboratory of Engineering Plastics, Institute of Chemistry, Chinese Academy of Sciences (ICCAS), Beijing 100190, P. R. China.

<sup>b</sup> University of the Chinese Academy of Sciences, Beijing 100049, P. R. China.

<sup>c</sup> China Shenhua Coal to Liquid and Chemical Co., Ltd. Beijing 100011, China.

## Supplementary Information 1-Further explanation on DMA

As the PGA content decreases, the storage modulus of the triblock copolymer gradually decreases. This indicates a gradual decrease in the stiffness of the copolymers. This is consistent with the high PGA modulus and low PBC modulus. In addition, within the low temperature range (<0 °C), as the PGA content decreases, The  $T_g$  of the PBC segments gradually moves towards the high-temperature direction in the loss modulus and ( $\tan\delta$ ). However, the  $T_g$  of PGA (40.7 °C by DSC) and the  $T_m$  of PBC (52.3 °C by DSC) are too close. Therefore, within the range of 40 °C - 80 °C, there is a transition from glass state to high elastic state in the PGA segments, as well as a transition from high elastic state to viscous flow state in the PBC segments. The  $T_g$  of PGA in DMA is affected by the melting of PBC segments, and the results are not accurate. It is difficult to completely distinguish between the two, which affects the accuracy of the  $T_g$  of PGA. But within -50 °C - 0 °C, there is only a phase transition of PBC from glass state to high elastic state, so the  $T_g$  of PBC is accurate. We can observe the  $T_g$  of the PBC chain segments in PGA-PBC-PGA90 in DMA, which is not observed in DSC. It also can be seen that the changes in  $T_g$  are consistent with those measured by DSC from the DMA curves.

**Table S1** Conversion rate of GL at different times.

| Time (min)     | 15   | 20   | 25   | 30   | 45   | 60   | 90   | 120  | 150  | 180  |
|----------------|------|------|------|------|------|------|------|------|------|------|
| Conversion (%) | 87.9 | 90.6 | 93.4 | 95.7 | 98.4 | 98.6 | 98.7 | 98.7 | 98.8 | 98.8 |

**Table S2** Diffusion coefficients of different characteristic peaks of PGA-PBC-PGA.

| Sample        | Diffusion coefficient of peak b | Diffusion coefficient of peak c | Diffusion coefficient of peak d |
|---------------|---------------------------------|---------------------------------|---------------------------------|
| PGA-PBC-PGA40 | $5.91 \times 10^{-12}$          | $5.50 \times 10^{-12}$          | $5.50 \times 10^{-12}$          |
| PGA-PBC-PGA50 | $4.93 \times 10^{-12}$          | $4.23 \times 10^{-12}$          | $4.23 \times 10^{-12}$          |
| PGA-PBC-PGA60 | $4.42 \times 10^{-12}$          | $3.82 \times 10^{-12}$          | $3.82 \times 10^{-12}$          |
| PGA-PBC-PGA70 | $1.65 \times 10^{-12}$          | $1.19 \times 10^{-12}$          | $1.19 \times 10^{-12}$          |

**Table S3** Degradation residual weights of PGA-PBC-PGA in the presence and absence of enzymes.

| Samples<br>Conditions | Residue weight (%) |       |       |       |       |       |       |       |
|-----------------------|--------------------|-------|-------|-------|-------|-------|-------|-------|
|                       | PGA                | PGA90 | PGA80 | PGA70 | PGA60 | PGA50 | PGA40 | PBC   |
| Enzymatic             | 3.71               | 36.56 | 58.16 | 65.36 | 74.80 | 83.30 | 86.62 | 95.84 |
| Without enzymatic     | 13.97              | 55.98 | 66.19 | 73.90 | 77.32 | 89.88 | 91.34 | 99.04 |

**Table S4** The structural composition of PGA-PBC-PGA copolymers before degradation, after enzymatic degradation, and after non-enzymatic degradation.

| Samples<br>Conditions               | PGA90              | PGA80 | PGA70 | PGA60 | PGA50 | PGA40 |
|-------------------------------------|--------------------|-------|-------|-------|-------|-------|
|                                     | Before degradation | 90.0  | 80.0  | 70.0  | 60.0  | 50.0  |
| Enzymatic catalyzed degradation     | 79.6               | 70.2  | 57.0  | 51.9  | 42.7  | 34.2  |
| Non-enzymatic catalyzed degradation | 78.4               | 69.9  | 56.7  | 49.9  | 42.4  | 33.3  |

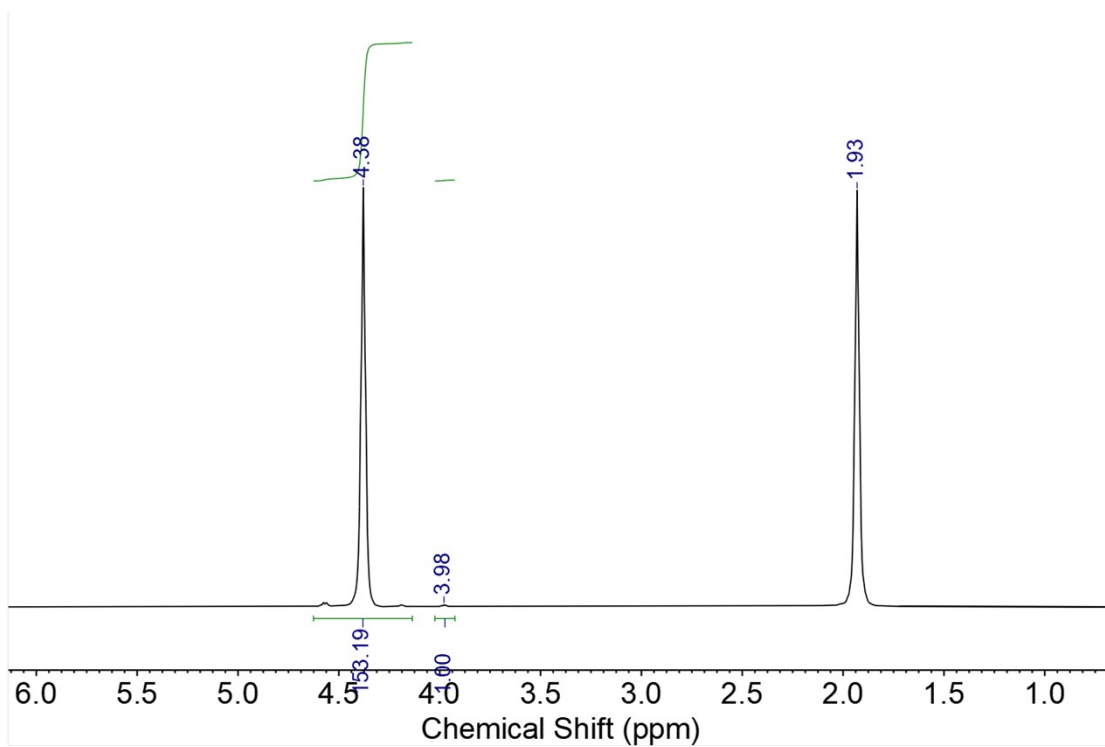

Fig.S1 <sup>1</sup>H NMR spectra of PBC-OH.

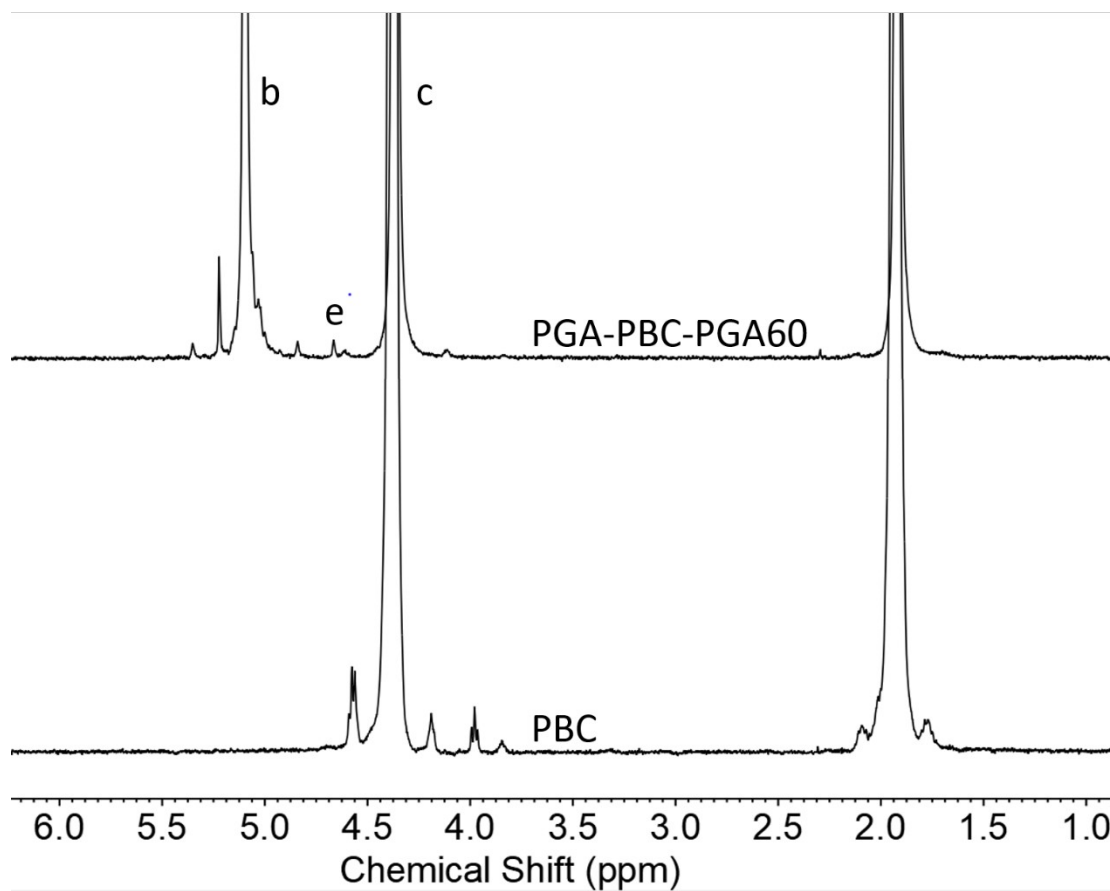

Fig.S2 <sup>1</sup>H NMR spectra of PGA-PBC-PGA60 and PBC-OH.

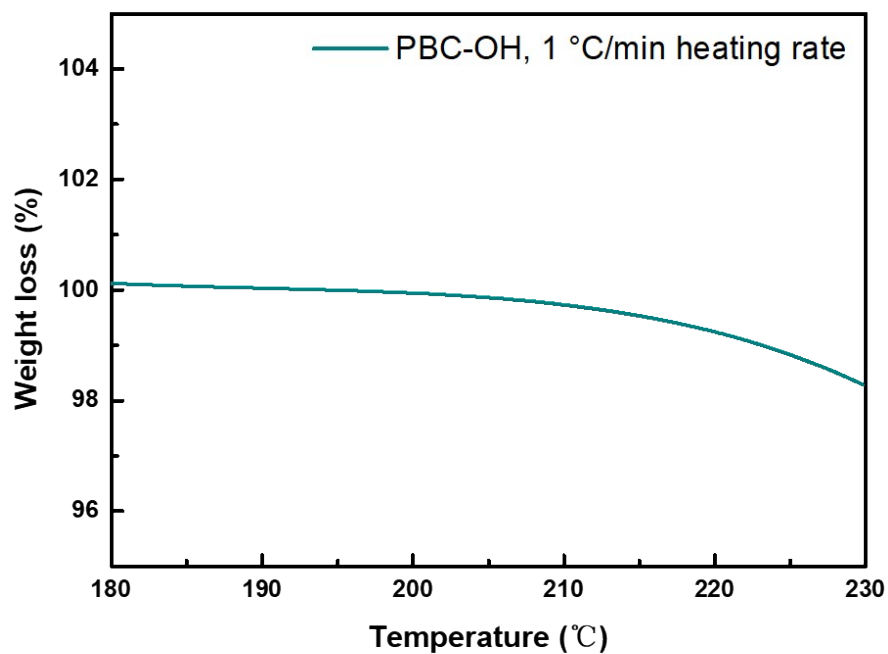

Fig.S3 TGA curve of PBC-OH at a heating rate of 1 °C /min.

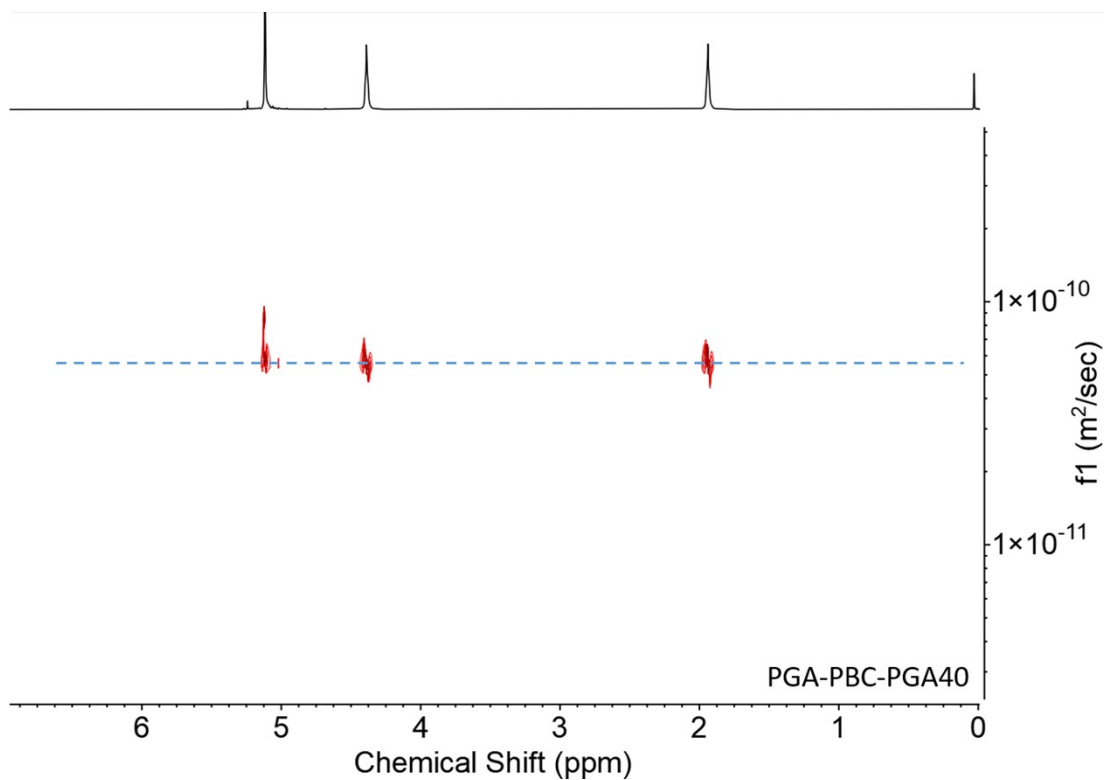

Fig.S4 DOSY spectra of PGA-PBC-PGA40.

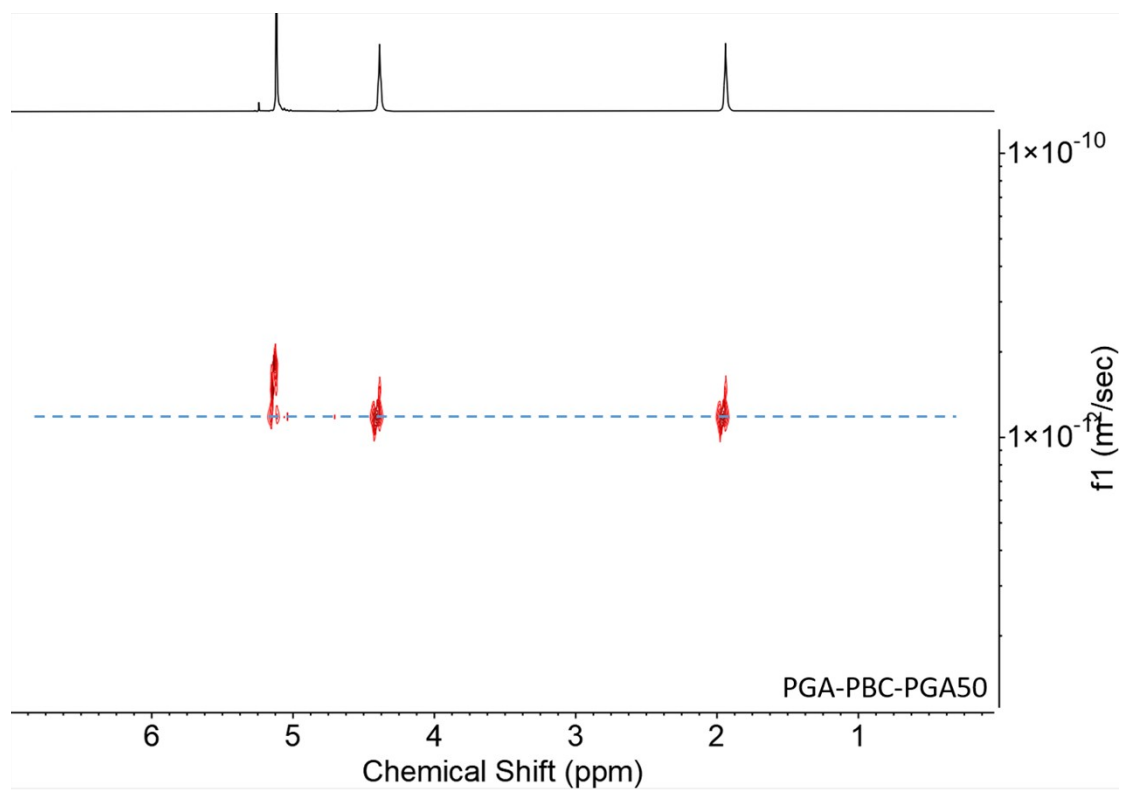

Fig.S5 DOSY spectra of PGA-PBC-PGA50.

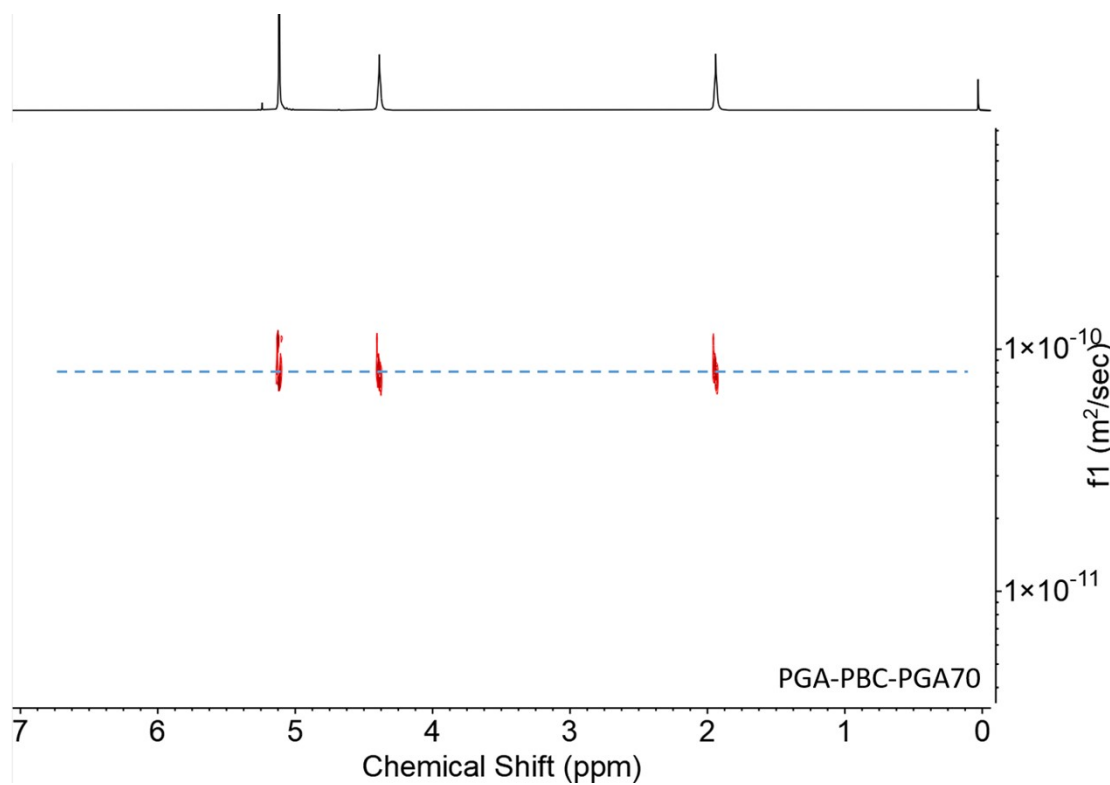

Fig.S6 DOSY spectra of PGA-PBC-PGA70.

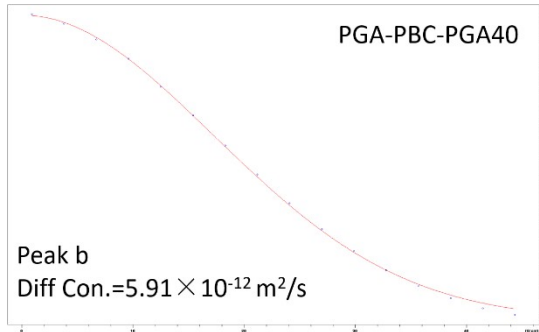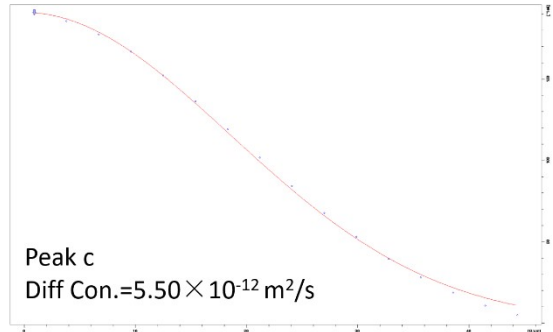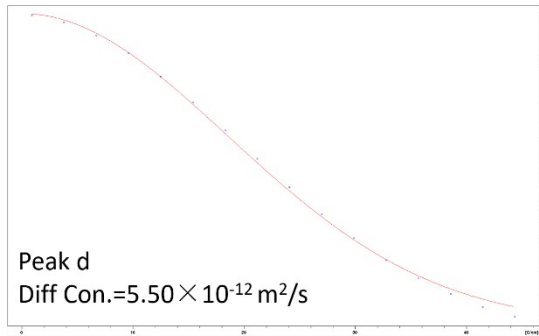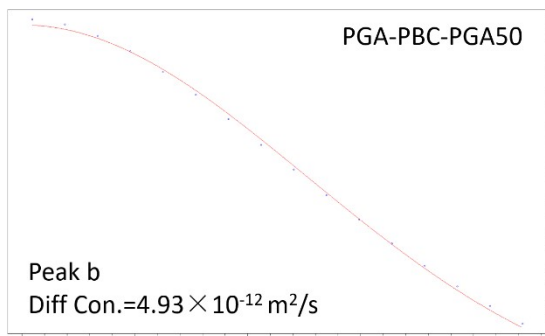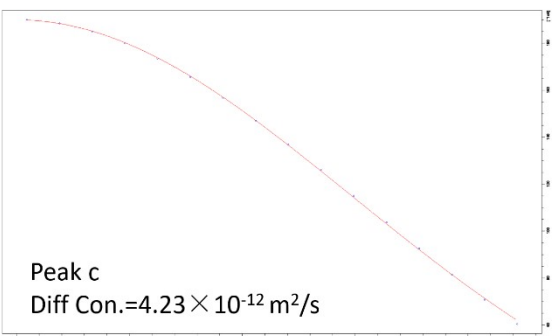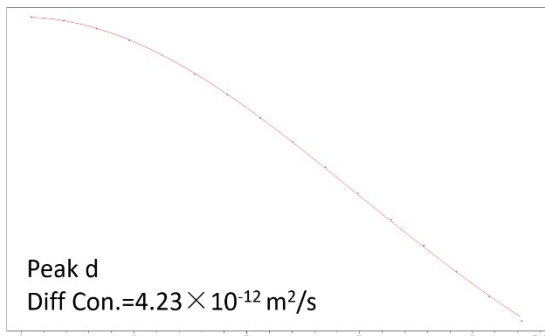

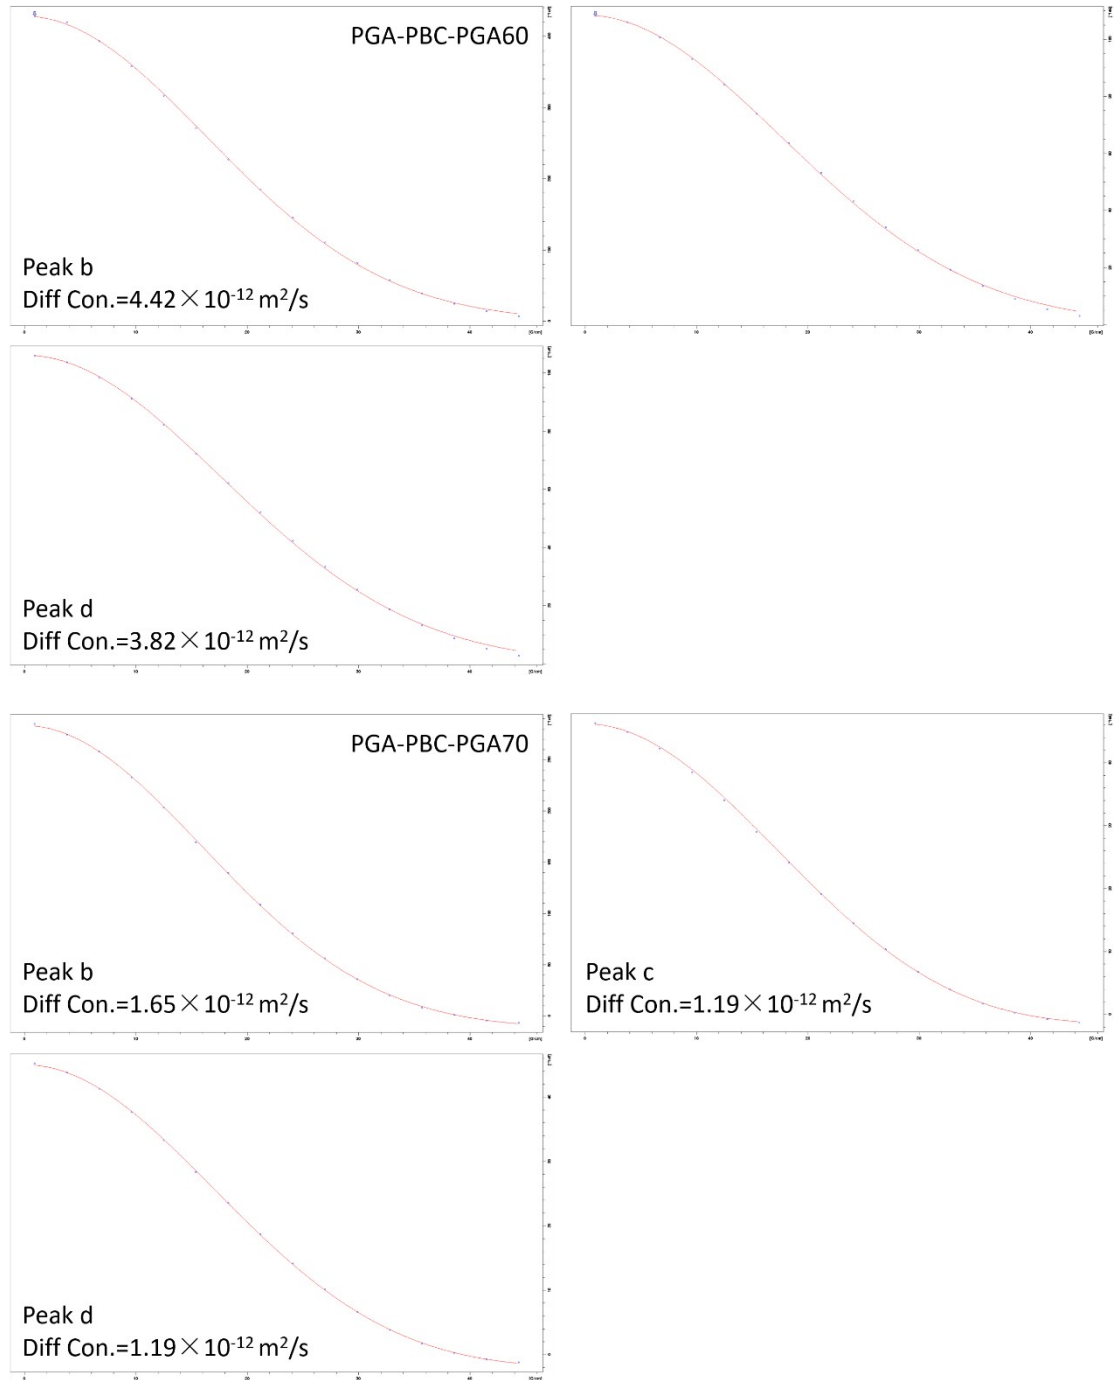

**Fig.S7** Fitting curves of diffusion coefficients for different characteristic peaks of PGA-PBC-PGA.

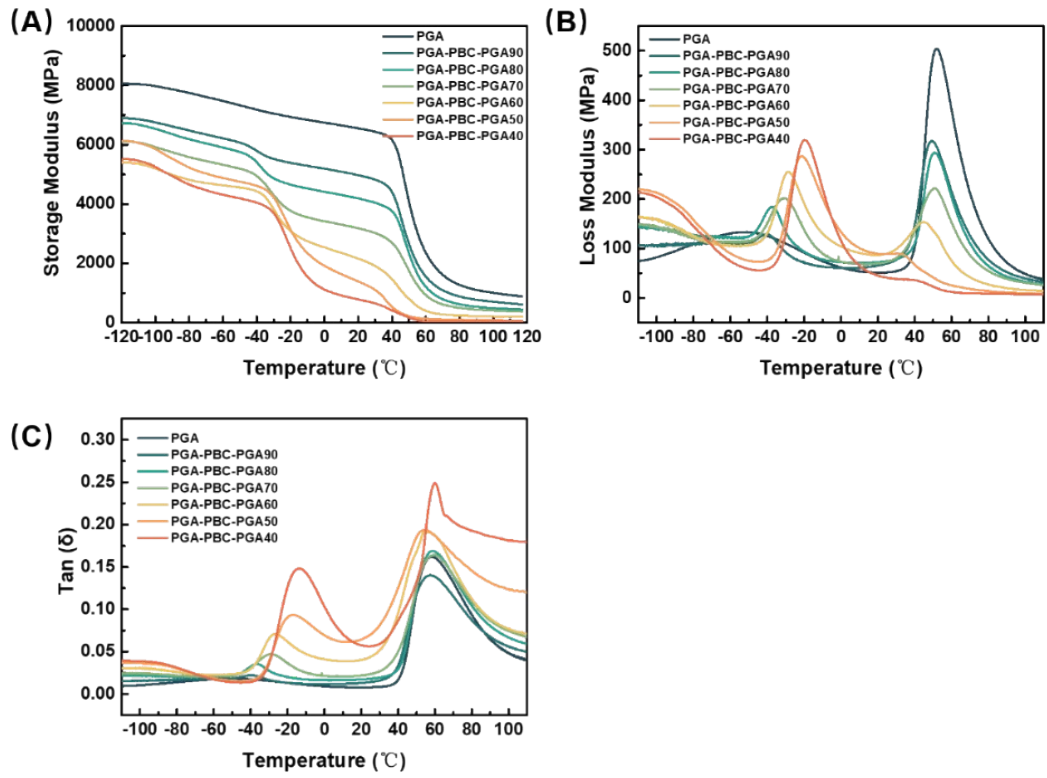

Fig.S8 DMA curves of PGA-PBC-PGA.

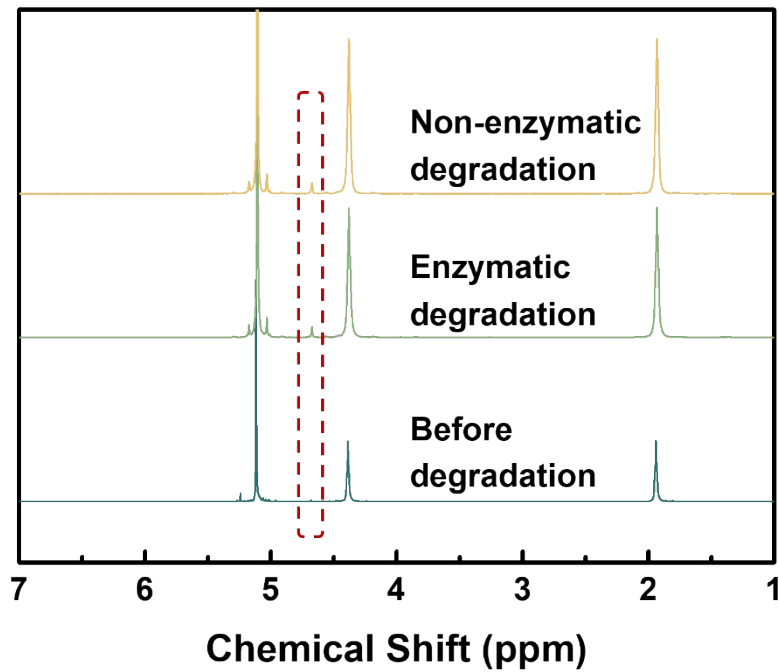

Fig.S9 <sup>1</sup>H NMR spectra of PGA-PBC-PGA60 before degradation, after enzymatic degradation, and after non-enzymatic degradation.



**0 day**

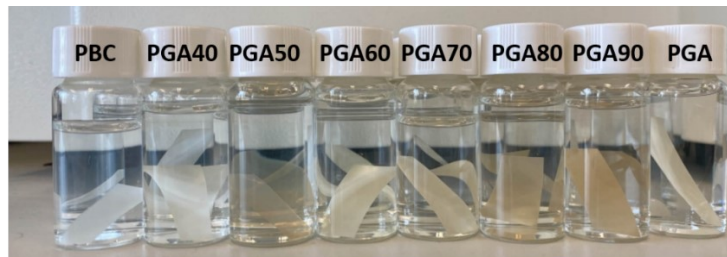

**14 days**

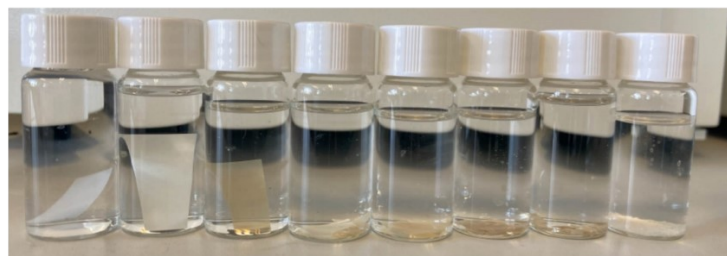

**28 days**

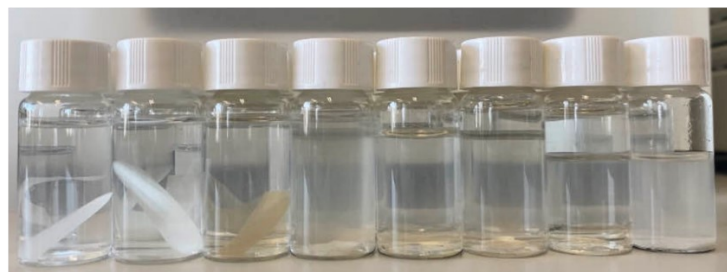

**Fig.S10** Pictures of degradation of PGA-PBC-PGA at different times.

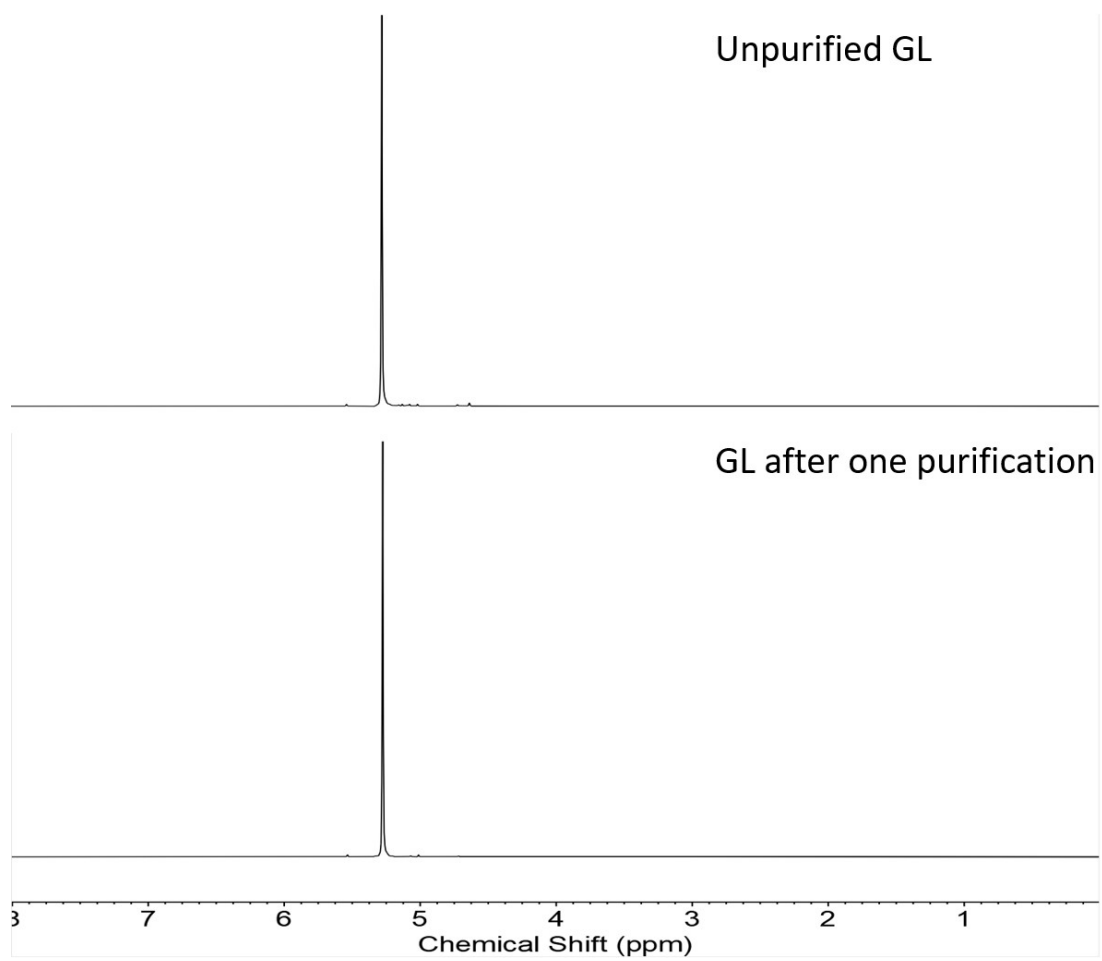

**Fig.S11** GL after decomposition of PGA-PBC-PGA60 and after one purification.
